# Supplementary material for: Robust increase of leaf size by Arabidopsis thaliana GRF3-like transcription factors under different growth conditions
Source: PubMed Central journal article supplement (PMC6128883; doi:10.1038/s41598-018-29859-9), 2018-09-07
Supplement: 41598_2018_29859_MOESM1_ESM.pdf [file 41598_2018_29859_MOESM1_ESM.pdf]

## Supplementary Information for:

### **Robust increase of leaf size by *Arabidopsis thaliana* GRF3-like transcription factors under different growth conditions**

Matías Beltramino, María Florencia Ercoli, Juan Manuel Debernardi, Camila Goldy, Arantxa M. L. Rojas, Florencia Nota, María Elena Alvarez, Liesbeth Vercruyssen, Dirk Inzé, Javier F. Palatnik<sup>1,6</sup>, and Ramiro E. Rodriguez.

***Supplementary Figure S1. Expression levels of the GRF transcription factors in Arabidopsis thaliana plants expressing rGRF3.***

***Supplementary Figure S2. Plastochron length in rGRF3 and control plants under mild drought stress.***

***Supplementary Figure S3. rGRF3 plants are more resistant to Pseudomonas syringae pv. tomato DC3000.***

***Supplementary Figure S4. Full-length blots used to prepare Figures 2d (Panel a) and 5d (Panel b).***

***Supplementary Table S1. Distribution of GRFs in selected plants species and the occurrence of miR396 regulation.***

***Supplementary Table S2. Selection of soybean and rice GRFs for heterologous expression in Arabidopsis thaliana.***

***Supplemental Table S3. Relevant Gene Identifiers and oligonucleotide primers used in RT-qPCR.***

***Supplementary Table S4. Binary plasmids used in this study to generate transgenic lines.***

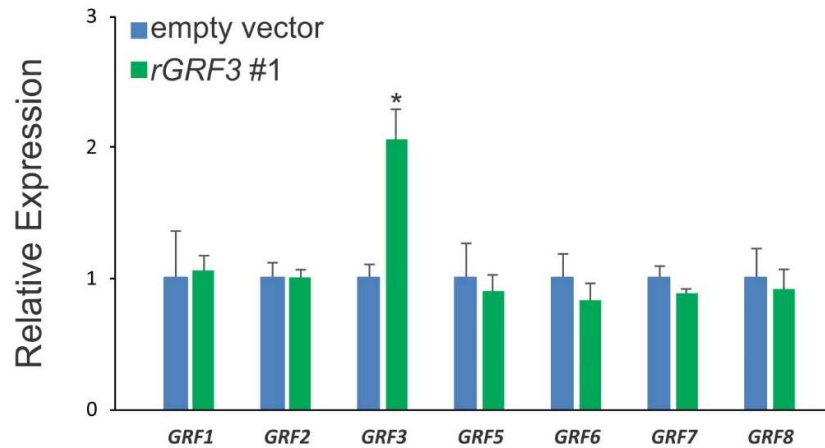

**Supplementary Figure S1. Expression levels of the GRF transcription factors in *Arabidopsis thaliana* plants expressing *rGRF3*.**

Expression levels of the *Arabidopsis* GRFs in homozygous T3 transgenic plants transformed with the empty vector or *rGRF3* (*rGRF3* #1). The gene expression levels were estimated by RT-qPCR and normalized to control plants (empty vector). The data shown are mean  $\pm$  SEM of three biological replicates. Asterisks indicate significant differences from control plants as determined by Student's t- test ( $P < 0.05$ ).

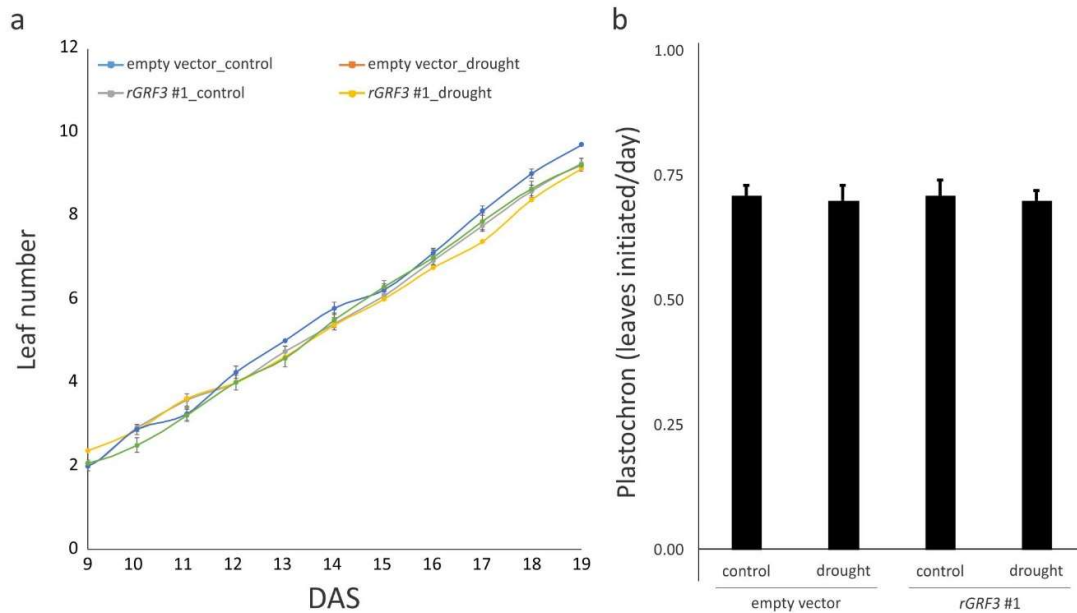

**Supplementary Figure S2. Plastochron length in *rGRF3* and control plants under mild drought stress.**

- a. Time course analysis of the number of leaves under well-watered or mild drought conditions of control (empty vector) and *rGRF3* #1 plants.
- b. Plastochron length (expressed as the number of leaves initiated per day) in control (empty vector) or *rGRF3* #1 under well-watered or mild drought conditions.

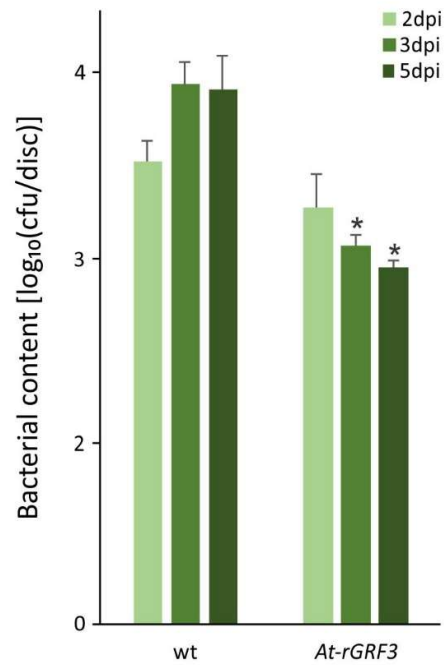

**Supplementary Figure S3. *rGRF3* plants are more resistant to *Pseudomonas syringae* pv. *tomato DC3000*.**

Bacterial growth was quantified at 2, 3 and 5 days post infection (dpi) on leaves of adult plants infiltrated with pathogen suspensions ( $5 \cdot 10^5$  cfu/ml). Similar results were obtained in 3 biological replicates and the results of a representative experiment is shown. Asterisks indicate significant differences between control and *rGRF3* as determined by Student's t-test ( $P < 0.05$ ).

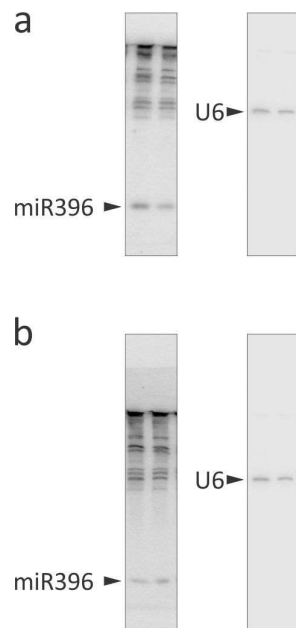

**Supplementary Figure S4. Full-length blots used to prepare Figures 2d (Panel a) and 5d (Panel b).**

**Supplementary Table S1. Distribution of GRFs in selected plants species and the occurrence of miR396 regulation**

| <i>Especie</i>                 | Common Name           | Number of GRFs | miR396 target GRFs | % target | non-targets | Data from:         | Classification |
|--------------------------------|-----------------------|----------------|--------------------|----------|-------------|--------------------|----------------|
| <i>Glycine max</i>             | Soybean               | 21             | 21                 | 100      | 0           | PTFDb <sup>a</sup> | Eudicot        |
| <i>Populus trichocarpa</i>     | Poplar                | 19             | 19                 | 100      | 0           | PTFDb              | Eudicot        |
| <i>Brassica rapa</i>           | Turnip                | 17             | 13                 | 76       | 4           | Wang et al 2014    | Eudicot        |
| <i>Manihot esculenta</i>       | Cassava               | 17             | 15                 | 88       | 2           | PTFDb              | Eudicot        |
| <i>Solanum lycopersicum</i>    | Tomato                | 13             | 12                 | 92       | 0           | PTFDb              | Eudicot        |
| <i>Malus domestica</i>         | Apple                 | 12             | 12                 | 100      | 0           | PTFDb              | Eudicot        |
| <i>Prunus persica</i>          | Peach                 | 10             | 10                 | 100      | 0           | PTFDb              | Eudicot        |
| <i>Theobroma cacao</i>         | Cacao                 | 10             | 10                 | 100      | 0           | PTFDb              | Eudicot        |
| <i>Citrus sinensis</i>         | Orange                | 10             | 10                 | 100      | 0           | PTFDb              | Eudicot        |
| <i>Arabidopsis thaliana</i>    | Arabidopsis           | 9              | 7                  | 78       | 2           | Kim et al 2003     | Eudicot        |
| <i>Arabidopsis lyrata</i>      | Lyrata                | 9              | 7                  | 78       | 2           | PTFDb              | Eudicot        |
| <i>Solanum tuberosum</i>       | Potato                | 9              | 9                  | 100      | 0           | PTFDb              | Eudicot        |
| <i>Capsella rubella</i>        | Pink shepherd's purse | 8              | 6                  | 75       | 2           | PTFDb              | Eudicot        |
| <i>Vitis vinifera</i>          | Grape                 | 8              | 8                  | 100      | 0           | PTFDb              | Eudicot        |
| <i>Carica papaya</i>           | Papaya                | 7              | 7                  | 100      | 0           | PTFDb              | Eudicot        |
| <i>Medicago truncatula</i>     | Medicago              | 6              | 6                  | 100      | 0           | Bazim et al 2013   | Eudicot        |
| <i>Zea mays</i>                | Maize                 | 14             | 12                 | 86       | 2           | Zhang et al 2008   | Monocot        |
| <i>Oriza sativa</i>            | Rice                  | 12             | 11                 | 92       | 1           | Choi et al 2004    | Monocot        |
| <i>Sorghum bicolor</i>         | Sorghum               | 10             | 9                  | 90       | 1           | PTFDb              | Monocot        |
| <i>Setaria italica</i>         | Foxtail millet        | 11             | 10                 | 91       | 1           | PTFDb              | Monocot        |
| <i>Brachypodium distachyon</i> | Purple false brom     | 11             | 9                  | 82       | 2           | PTFDb              | Monocot        |

<sup>a</sup> PTFDb: Plant Transcription Factor Database (<http://planttfdb.cbi.pku.edu.cn/>)

Supplementary Table S2. Selection of soybean and rice *GRFs* for heterologous expression in *Arabidopsis thaliana*

| Organism                    | Gene                          | Source                                | Similarity to <i>AtGRF3</i> (%) | Selected <i>GRF</i> |
|-----------------------------|-------------------------------|---------------------------------------|---------------------------------|---------------------|
| <i>Arabidopsis thaliana</i> | <i>AtGRF1</i>                 | Kim et al (2003) The Plant Journal    | 36.8                            |                     |
|                             | <i>AtGRF2</i>                 |                                       | 32.6                            |                     |
|                             | <b><i>AtGRF3</i></b>          |                                       | <b>100.0</b>                    | <b>(+)</b>          |
|                             | <i>AtGRF4</i>                 |                                       | 74.8                            |                     |
|                             | <i>AtGRF5</i>                 |                                       | 29.8                            |                     |
|                             | <i>AtGRF6</i>                 |                                       | 26.9                            |                     |
|                             | <i>AtGRF7</i>                 |                                       | 35.9                            |                     |
|                             | <i>AtGRF8</i>                 |                                       | 33.1                            |                     |
|                             | <i>AtGRF9</i>                 |                                       | 26.7                            |                     |
| <i>Oryza sativa</i>         | <i>OsGRF1</i>                 | Choi et al. (2004) Plant Cell Physiol | 32.0                            |                     |
|                             | <i>OsGRF2</i>                 |                                       | 34.8                            |                     |
|                             | <i>OsGRF3</i>                 |                                       | 32.4                            |                     |
|                             | <b><i>OsGRF4</i></b>          |                                       | <b>38.2</b>                     | <b>(+)</b>          |
|                             | <i>OsGRF5</i>                 |                                       | 32.0                            |                     |
|                             | <i>OsGRF6</i>                 |                                       | 33.3                            |                     |
|                             | <i>OsGRF7</i>                 |                                       | 33.0                            |                     |
|                             | <i>OsGRF8</i>                 |                                       | 32.2                            |                     |
|                             | <i>OsGRF9</i>                 |                                       | 37.4                            |                     |
|                             | <i>OsGRF10</i>                |                                       | 29.7                            |                     |
|                             | <i>OsGRF11</i>                |                                       | 21.1                            |                     |
|                             | <i>OsGRF12</i>                |                                       | 23.7                            |                     |
| <i>Glycine max</i>          | <i>Glyma.01G148600</i>        | PTFDb <sup>a</sup>                    | 38.1                            |                     |
|                             | <i>Glyma.01G234400</i>        |                                       | 36.9                            |                     |
|                             | <b><i>Glyma.03G192200</i></b> |                                       | <b>58.9</b>                     | <b>(+)</b>          |
|                             | <i>Glyma.04G230600</i>        |                                       | 31.6                            |                     |
|                             | <i>Glyma.07G038400</i>        |                                       | 30.2                            |                     |
|                             | <i>Glyma.09G068700</i>        |                                       | 32.7                            |                     |
|                             | <i>Glyma.09G212500</i>        |                                       | 37.0                            |                     |
|                             | <i>Glyma.10G067200</i>        |                                       | 54.5                            |                     |
|                             | <i>Glyma.11G008500</i>        |                                       | 37.9                            |                     |
|                             | <i>Glyma.11G110700</i>        |                                       | 36.6                            |                     |
|                             | <i>Glyma.11G208800</i>        |                                       | 56.1                            |                     |
|                             | <i>Glyma.12G014700</i>        |                                       | 36.0                            |                     |
|                             | <i>Glyma.13G109500</i>        |                                       | 31.9                            |                     |
|                             | <i>Glyma.15G176500</i>        |                                       | 33.3                            |                     |
|                             | <i>Glyma.16G007600</i>        |                                       | 32.0                            |                     |
|                             | <i>Glyma.17G050200</i>        |                                       | 33.0                            |                     |
|                             | <i>Glyma.17G232600</i>        |                                       | 34.2                            |                     |
|                             | <i>Glyma.17G232700</i>        |                                       | 34.0                            |                     |
|                             | <i>Glyma.19G192700</i>        |                                       | 60.3                            |                     |
|                             | <i>Glyma.U028600</i>          |                                       | 34.0                            |                     |
| <i>Glyma.U028700</i>        | 34.4                          |                                       |                                 |                     |

<sup>a</sup> PTFDb: Plant Transcription Factor Database (<http://planttfdb.cbi.pku.edu.cn/>)

**Supplemental Table S3. Relevant Gene Identifiers and oligonucleotide primers used in RT-qPCR.**

| <b>Gene</b>   | <b>Locus ID</b> | <b>RT-qPCR Forward primer</b> | <b>RT-qPCR Reverse primer</b> |
|---------------|-----------------|-------------------------------|-------------------------------|
| <i>AtGRF1</i> | At2g22840       | ATGGAAAGAAATGGCGGTGCTC        | CGGCGGCAGCATTAGTATTGT         |
| <i>AtGRF2</i> | At4g37740       | CACATCAACAGAGGCCGTCATCG       | AACCGGAGATTCCTTGGGTTGTAAG     |
| <i>AtGRF3</i> | At2g36400       | GTCTTCGCTGGCCACAAGTATT        | TGTTGCTGTTGTAGTGGTGGCT        |
| <i>AtGRF5</i> | At3g13960       | CTCTTCATCATGCTCCGCTTT         | TTGCTAACGGTTGTTGGTGATG        |
| <i>AtGRF6</i> | At2g06200       | TCCTCAAGAAAGCCTCCTCCTA        | ATCTTCCATTGCTGAGCCAGAG        |
| <i>AtGRF7</i> | At5g53660       | TGCGCGAAAGAAGTCGTCTCTA        | CACCATTGTTGTTAGGGCGAGA        |
| <i>AtGRF8</i> | At4g24150       | GCATGTGGAATCATCTCACCAA        | TCTCCGGGTTTAAGGTTCCAAT        |
| <i>PP2A</i>   | At1g13320       | CCTGCGGTAATAACTGCATCT         | CTTCACTTAGCTCCACCAAGCA        |
| <i>UBC</i>    | -               | GATCCACCCACCTCGTGTAG          | CTGGAGGGAAGTGAATGGTAAC        |
| <i>OsGRF4</i> | Os02g47280      | -                             | -                             |
| <i>GmGRF</i>  | Glyma.03g192200 | -                             | -                             |



**Supplementary Table S4. Binary plasmids used in this study to generate transgenic lines.**

**Reporter and protein expression vectors.**

| Vector | Construct                              | Arabidopsis Chromosome: start-end <sup>a</sup>                                                                      |
|--------|----------------------------------------|---------------------------------------------------------------------------------------------------------------------|
| RER32  | <i>rGRF3</i><br>( <i>pGRF3-rGRF3</i> ) | <i>pGRF3:rGRF3</i> ; 2: 15273644 – 15270078<br>CGC AAC CGT TCT AGA AAA CCA GTA GAG ACT CCA<br>R N R S R K P V E T P |
| RER35  | <i>rGRF2</i><br>( <i>pGRF2-rGRF2</i> ) | <i>pGRF2:rGRF2</i> ; 4: 17729690 - 17725303<br>CGT CAT CGT TCT AGA AAA CCG GTC GAA GTC CAA<br>R H R S R K P V E V Q |
| RER149 | <i>pGRF3-rGRF2</i>                     | <i>pGRF3</i> (2: 15273644 - 15272819) – <i>rGRF2</i> (4: 17727612 - 17725536)                                       |
| RER160 | <i>At-rGRF3</i>                        | <i>pGRF3</i> (2: 15273644 - 15272819) – <i>At-rGRF3</i> CDS <sup>b</sup>                                            |
| RER159 | <i>Gm-rGRF</i>                         | <i>pGRF3</i> (2: 15273644 - 15272819) – <i>Gm-rGRF</i> CDS <sup>c</sup>                                             |
| RER158 | <i>Os-rGRF4</i>                        | <i>pGRF3</i> (2: 15273644 - 15272819) – <i>Os-rGRF4</i> CDS <sup>d</sup>                                            |

**miR396 and MIM396 expression vectors.**

| Vector | Construct            | Expressed sequence <sup>e</sup>                                                                                                                                                                                                                                                                                                                                                                                                                                                                                                              |
|--------|----------------------|----------------------------------------------------------------------------------------------------------------------------------------------------------------------------------------------------------------------------------------------------------------------------------------------------------------------------------------------------------------------------------------------------------------------------------------------------------------------------------------------------------------------------------------------|
| JP123  | <i>35S:miR396b</i>   | GGATCCCCCTAGAGTGGTCTCTTCTGAGTTTCTCTATATGCTAGTTGCTCAACTAATATCT<br>CTCTCTCTATCTCTCAACAATTCTCTTAAAGTTAATTAGTTTTTTCAGAGAAGGAGAAGATG<br>AAGATCCTGGTCATACTTTTCCACAGCTTCTTGAACCTTCTTTTTCATTTCCATTTGTTTT<br>TTTCTTAAACAAAAGTAAGAAGAAAAAACTTTAAGATTAAGCATTTTGGAAAGCTCAAGA<br>AAGCTGTGGGAAAACATGACAATTCAGGGTTTTACTCCATTGATTACCTGTCAAGATTCT<br>TCTTCCAAAGATATTGATTGAAGGTATGGTTACATAAACCCCTTATTCCTAAATGAAG<br>ACACAGGATAACTCTTTAGATCCATAATTATGGTCAGAATTATGGATCTAAAGAGTCTGCA                                                                              |
| MB11   | <i>35S:9x-MIM396</i> | GATCCGCCGTAGCCGGCAGGTCTTCTCCCTCTAGAAATTGTTCAAGAGCTCAGCTGTGGAA<br>AGCTTCGGTTTTTCTCTTTGGAATGTTCAAGAGCGCAGCTGTGGAATTTTCAATTTTTT<br>GGTTGGAATGTTCAAGAGCTTAGCTGTGGAATTTTGGATGGAAGATCCGCCGTAGCCGGCAG<br>GTCCTCTCCCTCTAGAAATTGTTCAAGAGCTCAGCTGTGGAAAGCTTCGGTTTTTCTCTTT<br>GGAATGTTCAAGAGCGCAGCTGTGGAATTTTCAATTTTTTGGTTGGAATGTTCAAGAGC<br>TTAGCTGTGGAATTTTGGATGGAAGATCCGCCGTAGCCGGCAGGTCTTCTCCCTCTAGAAAT<br>TGTTCAAGAGCTCAGCTGTGGAAGCTTCGGTTTTTCTCTTTGGAATGTTCAAGAGCGCAG<br>CTGTGGAATTTTCAATTTTTTGGTTGGAATGTTCAAGAGCTTAGCTGTGGAATTTTGGAT<br>GGAAGATC |

All constructs were cloned in the binary vector pCHF3 (Jarvis, P., Chen, L. J., Li, H., Peto, C. A., Fankhauser, C., and Chory, J. (1998). An Arabidopsis mutant defective in the plastid general protein import apparatus. *Science* 282, 100103). T-DNA constructs were introduced into *A. tumefaciens* strain ASE (Fralely, R. T., Rogers, S. G., Horsch, R. B., Eichholtz, D. A., Flick, J. S., Fink, C. L., Hoffmann, N. L., and Sanders, P. R. (1985) The SEV system: a new disarmed Ti plasmid vector system for plant transformation. *Biotechnology* 3, 629635).

<sup>a</sup> Highlighted in yellow, nucleotides annealing with miR396. Underlined, mutagenized residues. In red, upstream and downstream sequences.

<sup>b</sup> *At-rGRF3* : ATGGATTGCAACTGAAACAATGGAGAAGCCAGCAGCAGCAACAACATCAGACAGAGTCAGAAGAACAACCTTCTGCAGCTAAGATACAAAACATGTCTTTGACCAGATTCATTTCCACACTGCAACTTCTACTGCTTCTCTCTTTACCCCTGAGCCTACTTCTTCTAACTCTCTCTTTGTCTCCTGATTCTTCTCCAGTTCCCAAGATGGGGAGCTTCTTTAGCTGGGCACAGTGGCAAGAAGCTGAACTACAAGCTCTGATCTACAGGTACATGTTGGCTGGTGTCTGCTGTTCTCAGGAGCTCCTTTTACCAATCAAGAAAAGCCTTCTCCATCTATCTCTTCTACTTTCTTACCATCTCTTCAACACCTACCTCATTACCACTGCTTGGTATTTGGGAAGGGCAGCGATGGATCCTGAGCCAGGCAGATGCAGGAGAACGGATGGTAAGAAGTGGAGATGTTCAAGAGACGTCTTCGCTGGCCACAAGTATTGCGAGCGCCACATGCACCGTGGCCGCAACCGTTCTAGAAAaCCaGTaGAgACTCCAACCACCGTCAATGCAACTGCCACGTCCATGGCTTCATCAGTAGCAGCCGCAGCCACTACAACAGCAACAACAACATCTACGTTTGTCTTTGGTGGTGGTGGTAGTGAGGAAGTGGTGGTCAAGGAGGATCTTTCTTCTCTGGCTCTTCTAACTCTTCATCTGAACCTTCCACCTTAGTCAAAGTTGTTCCGAGATGAAGCAAGAAAGCAACAACATGAACAACAAGAGGCCATACGAGTCCACATCGGATTCAGTAACAACAGATCAGATGGAGGACACATCCTGAGGCCCTTCTTTGACGATTGGCCTCGTTCTTCGCTCCAAGAAGCTGACAATAGTTCAAGCCCCATGAGCTCAGCCACTGTCTCTCCATCTCCATGCCGGGAAGCTTCTCTCAAGCTCTCTGAAGCTGCCACAGGCAACGAAGAGGGAGCCGGAGCAACAACAATGGGAGAGATCAGCAAAAACATGAGCTGGTGAGCGGTGGAGGTTCCAACCACCATCATCAACATGGGCGGACCATTGGCCGAAGCCCTGAGATCTTCTCTCATCTTCCCAACCA GTGTTCTCCATCAGCTTGGTGTCTCGACACAAGCCTTTCATTGA

<sup>c</sup> *Gm-rGRF*: ATGGACTTCCATCTGAAGCAATGGAGAAACAGCAGCAGTCCAGAGGAACAACATTCTACAAGATGCCAAAACCTTCTCCC TGAATCCCATCAACAACAACAGCCATCAGCCTCTGCACTCCCTTTGTTGTACCTGAACCCAACAGCAGCAAAAGTACGACCCCTATTATTT CCCAGGATGGGGAGCTACTTCAGCTTGTCTCAGTGGCAGGAGCTTGAAGTTGAGGCTTTGATATTACGGTACATGTTGGCTGGTGTGC TGTTCTCTGAACTCCTTCAACCAATCAAGAAAAGCCTTCTTCACTTCCACACTATTACCTCCATCACCTCTCCAACATTACCAACCTTC TGCTTGGTATTGGGGTAGAGGAGCGATGGATCCGGAGCCAGGGCGGTGCCGAGAAACCGACGCAAGAAAGTGGCGCTGTTGAGGG ACCTGGTGGCTGGGCAAAAGTACTGTGAGCGCCACATGCACCGTGAAGAAACCGTTCTAGAAAaCCaGTaGAgCTACCCACCAACT AGTGCTATTAACAATTGTTGGTGAAGTGGAGTTGGATCCCTAGGACAGGTGCTTCATCATCTTCCATTTGTTACCCACCTTAGCTTCTG CTTCAATCAAATCTCCTTTTATGATCTTATGATGAACGTTCTCTGGACCAAGAATGAAGACGAAGATCATGTGGGTGGGATGGC AGATCAGGTGGAGGTGGTGGCCATATGCTGAGGCAATTTCTCGATGATTGGCCACGATCACTCCAAGACTCTGACAACGTTGAAAACA ATGCTGCTGTGGCCGTAGCCTCTCTATTTCAATGCCCGTGTCTTCTCGATGTGTATTGAAATGTCCACGGGTATGGAGAGGACT CCGGGCCAGGAAATGAGAATGTAAGCCTCGAGCCAGAGCAGCTGCAAGTTGAATTGGGCGGAGGATGGGCTCGTCTAATCAAGTGG CTTGATGGGAGGTCCACTTGTGAGGCACTCAGATCATCTACTTCAACCTCATCTCCCACTAGTGTTTTGCATCGTCACTTGCCCTCGTG ATCTGAGACCAGCTTATTAGCACCTGA

<sup>d</sup> *Os-rGRF4*: ATGCCTCCCTGTCTCCGGCGGTGGCCGACCACCGCTCGTCCCCGGCAGCCGCGACCGCCTCCCTCTCCCTTCTGCGGCT CCACCCCGCTCCGCGTAAGCAACGCGAACCAGCGGCTACAACCCATTTCTTGGCTCCAGTGGTGCATGTGACAACACGGTGGAGAGC TTGTGTGTGGGTGGGTGGGTGCAAGGGGCGGTGGTGGCGTCCGATGGGGGAGGACGCGCCGATGACCGCGAGGTGGCCGCGGCG GCGGGCGGAGGCTGCCGCCGTTACCGCGGCGCAGTACGAGGAGCTGGAGCAGCAGGCGCTATATACAAGTACCTGGTGGCAGG CGTGCCCGTCCCGCGGATCTCGTGTCTCCCATCCGCGCGGACTCGACTCCCTCGCGCCCGCTTCTACAACCATCCCGCCCTGGATA TGGTCCGTACTTCGGCAAGAAGCTGGACCCAGAGCCAGGGCGGTGCCGGCGTACGGACGGCAAGAAATGGCGGTGCTCGAAGGAGG CCGCGCGGATTCAGTACTGCGAGCGCCACATGCACCGCGGCGCAACCGTTCTAGAAAaCCaGTaGAgACGCAGCTGGTCCGCCAG TCCCAACCGCCCTCATCTGTTGTGGTCTGCGGCGGCGCCCTGTGCTGCTCCTCAATGGCAGCAGCTTCCAAAACCACTCTCTTTACC CTGCTATTGCCGCGAGCAATGGCGGGGGCGGGGGAGGAACATGCCAGCTCATTGGCTCGGCGTTGGGTTCTCAGCTGCACATGG ATAATGCTGCCCTTATGCAGCTGTTGGTGGTGGAAACAGGCAAAGATCTCAGGTATACTGCTTATGGCACAAGATCTTTGGCGGATGA GCAGAGTCAACTACTGAAAGTATCAACACATCTATTGAAAATCCATGGCGGCTGCTGCCATCTCAGAACTCGCCATTTCCCTTTT AAGCTATTCTCAGCTGGGGGCACTAAGTGACCTTGGTCAAGAACCCCCAGCTCACTTTCAAAGTTTCAAGGAGGCAAGGCAAGGGA TGGGAACGACTATGCGGCTGTGATTCTGTGAAGCAAGAGAACCAGACGCTGCGTCCCTCTTTGATGAGTGGCCAAAGGGAAGGGA TTCATGGTCAAGCTCGCTGATGAGAATGCTAATCTTTGTCATTCTCAGGCACCAACTGTGATCTCCATCAACATGGCATCTCTGAC TTCTCGGCGGCCAGTTCTCGATCAACTAATGGTACTGA

<sup>e</sup> Highlighted in yellow, the mature miRNA sequence expressed. In red, mutagenized residues. Underlined, the target mimicry sequence against miR396.
